# Supplementary material for: Controlling dimensionality of silver(i) coordination networks with rigid aliphatic amino ligands: from a 2D to a 3D network of unprecedented topology comprising helical channels
Source: Royal Society of Chemistry journal article supplement (doi:10.1039/b305188a), 2003-01-01
Supplement: b305188a.doc [file b305188a.doc]

# Supplementary data

Controlling Dimensionality of Silver(I) Coordination Networks with Rigid Aliphatic Amino Ligands: From a 2D to a 3D Network of Unprecedented Topology Comprising Helical Channels

Georg Seeber,a Alexandra L. Pickering,a De-Liang Long,a Leroy Cronina*

a Department of Chemistry, The University of Glasgow, University Avenue, Glasgow, G12 8QQ, UK. Fax +44 141 330 4888; Tel: +44 141 330 6650; E-mail: [L.Cronin@chem.gla.ac.uk](mailto:L.Cronin@chem.gla.ac.uk)

**Experimental:**

**[Ag(dapi)]NO3 (1)**: *cis*-3,5-Diaminopiperidine (100 mg, 0.87 mmol) was stirred in methanol (10 ml) at room temperature and a methanolic solution of silver nitrate (74 mg, 0.43 mmol) was added dropwise. The resulting grey precipitate was dried, water (6 ml) added and heated to 40°C to dissolve the solid completely to give a clear pale yellow solution. Evaporation from the aqueous solution afforded colourless, platelike crystals. Yield: 76 mg (0.27 mmol, 31%). IR (KBr) /cm-1 3434(bs), 3326(s), 2925(w), 2850(w), 1623(s), 1467(s), 1444(s), 1342(vs), 1267(m), 1164(w), 1141(w), 1091(w), 1002(m), 921(m), 840(w), 823(m). 1H-NMR (D2O, 400 MHz)  /ppm 3.10 (m, 2H), 2.97 (m, 2H), 2.23 (m, 3H), 1.18 (pq, *J* 11.3 Hz, 1H). 13C-NMR (D2O, 100 MHz)  /ppm 50.31 (CH2), 47.17 (CH), 40.19 (CH2). Elemental analysis for [C5H13AgN4O3)]n, found (expected) %: C 21.49 (21.07), H 4.46 (4.60), N 19.14 (19.66).

**[Ag(tach)]NO3** (**2**): Silver(I) nitrate (124 mg, 0.73 mmol) in a methanol / water mixture (1:1, 5 ml) was added dropwise to a solution of *trans*-tach (92 mg, 0.71 mmol) in methanol (5 ml). Colourless single crystals suitable for X-ray diffraction were obtained by diffusion of ether into a methanolic solution of **2**. Yield: 94 mg (0.314 mmol, 44%). IR (KBr) /cm-13294(w), 3252(w), 3167(w), 2904(w), 1601(w), 1315(vs), 1180(m), 1130(m), 1114(m), 1038(s), 1003(s), 980(m), 845(w), 826(m), 698(w), 590(s), 551(m), 513(s). 1H-NMR (D2O, 300 MHz)  /ppm 3.39 (s, 1H), 3.21 (t, *J* 12.0 Hz, 2H), 2.25 (d, *J* 11.5 Hz, 1H), 1.92 (d, *J* 12.8 Hz, 2H), 1.33 (dt, *J* 12.8, 3.5 Hz, 2H), 1.06 (pq, *J* 11.5 Hz,1H). 13C-NMR (D2O, 75 MHz)  /ppm 49.41 (CH2), 48.78 (CH), 47.33 (CH2), 43.29 (CH). Elemental analysis for [C6H15AgN4O3)]n, found (expected) %: C 24.01 (24.10), H 4.95 (5.06), N 18.93 (18.73).

The homogeneity of the bulk material produced in each case was confirmed optically and by multiple unit cell measurements of the isolated crystalline material.
